# Supplementary material for: Genome-wide identification and gene-editing of pigment transporter genes in the swallowtail butterfly Papilio xuthus
Source: PubMed Central journal article supplement (PMC7891156; doi:10.1186/s12864-021-07400-z), 2021-02-17
Supplement: 12864_2021_7400_MOESM2_ESM.pdf [file 12864_2021_7400_MOESM2_ESM.pdf]

**A**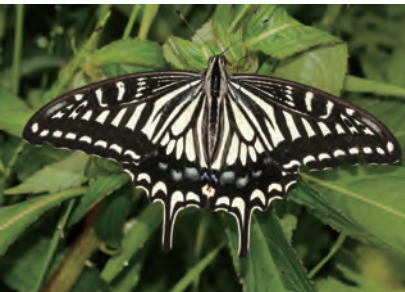**B**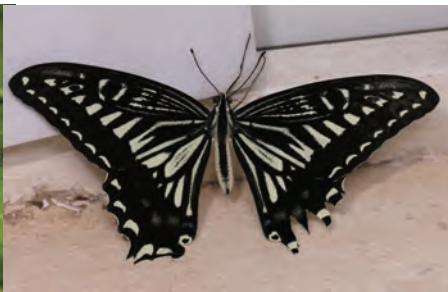**C**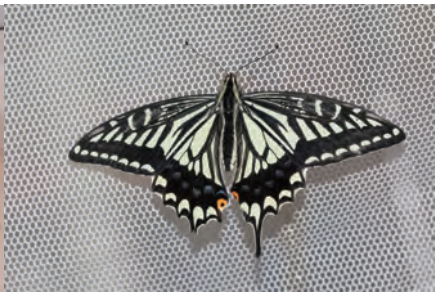**D** wild type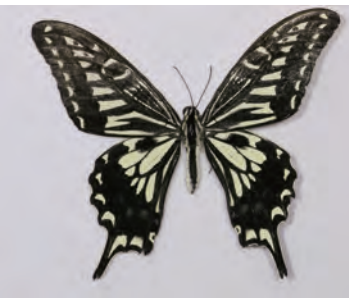**E** *white*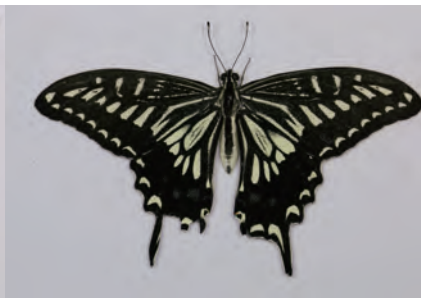**F** *scarlet*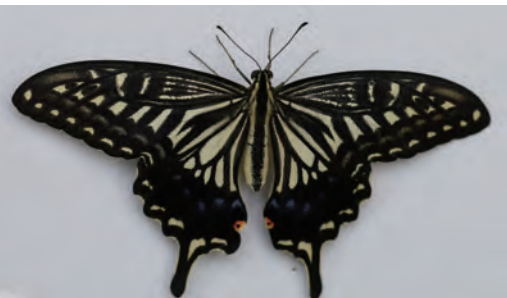*brown**ok**lightoid*
