# Supplementary material for: Genome-wide identification and gene-editing of pigment transporter genes in the swallowtail butterfly Papilio xuthus
Source: PubMed Central journal article supplement (PMC7891156; doi:10.1186/s12864-021-07400-z), 2021-02-17

**A**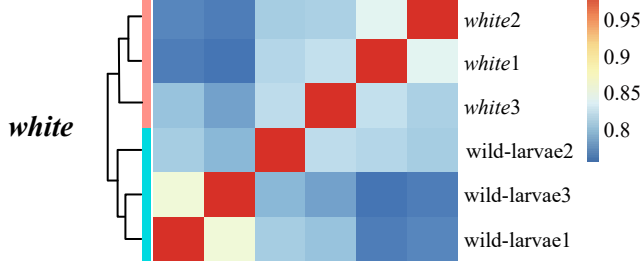**B**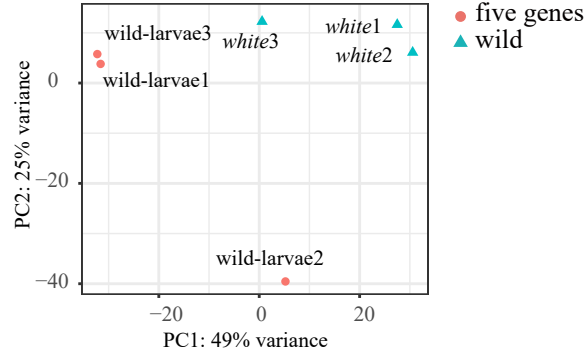**scarlet**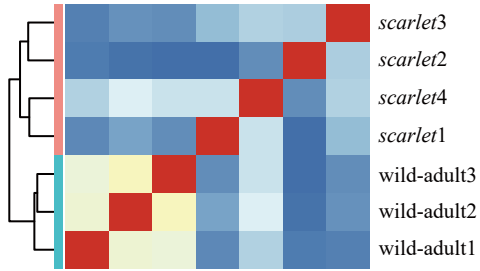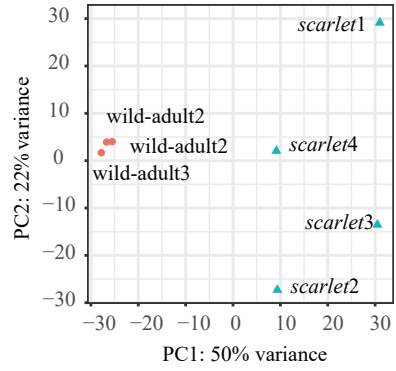**brown**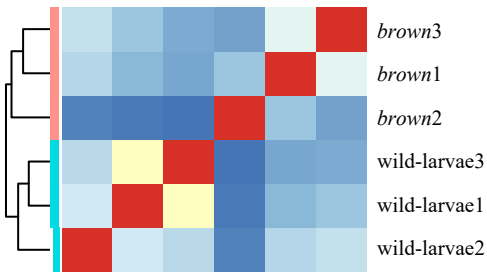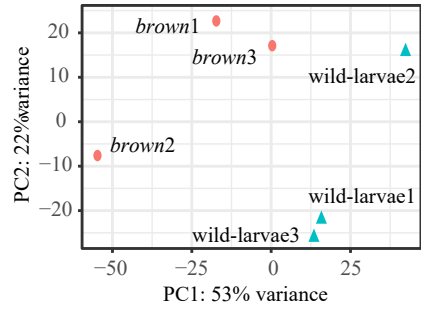**ok**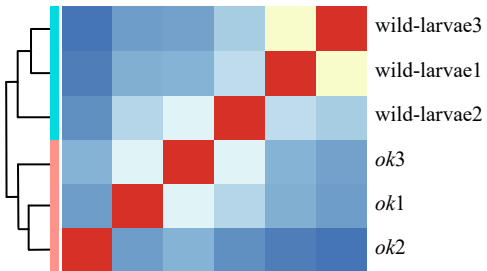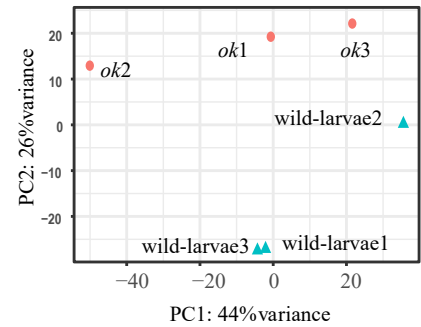**lightoid**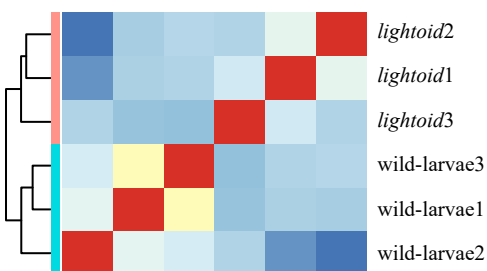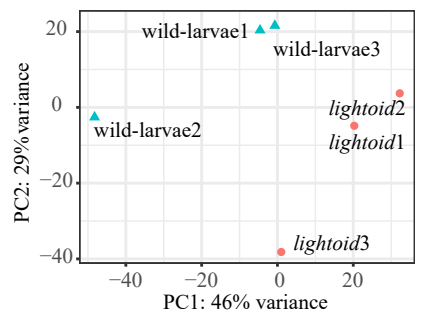

Supplement: 12864_2021_7400_MOESM5_ESM.pdf [file 12864_2021_7400_MOESM5_ESM.pdf]
